# Supplementary material for: Two-dimensional Ti3C2Tx MXene nanosheets for CO2 electroreduction in aqueous electrolytes
Source: Royal Society of Chemistry journal article supplement (doi:10.1039/d3ya00117b), 2023-01-01
Supplement: d3ya00117b1.pdf [file d3ya00117b1.pdf]

## Supplementary Information

### Two Dimensional $Ti_3C_2T_x$ MXene Nanosheets for $CO_2$ Electroreduction in Aqueous DElectrolytes

*Sarathkumar Krishnan<sup>a</sup>, Senthilkumaran Marimuthu<sup>a</sup>, Mayank K. Singh and Dhirendra K. Rai\**

*Sustainable Energy & Environmental Materials (SEEM) Lab, Department of Metallurgical Engineering and Materials Science (MEMS), Indian Institute of Technology Indore, Simrol, Indore 453552, India.*

*<sup>a</sup>Contributed equally to the work*

*\*Corresponding author: Tel: +91 731 660 3278*

*E-mail: dkrai@iiti.ac.in (D K Rai)*

## Table of contents

**Figure S1.** Schematic diagram of H-type cell

**Figure S2.** Powder-XRD patterns of  $\text{Ti}_3\text{AlC}_2$  MAX phase and  $\text{Ti}_3\text{C}_2\text{T}_x$

**Figure S3.** EDX spectra of  $\text{Ti}_3\text{C}_2\text{T}_x$

**Figure S4.** ATR-FTIR spectrum of  $\text{Ti}_3\text{C}_2\text{T}_x$  before and after  $\text{CO}_2$  adsorption

**Figure S5.** LSV curves comparison  $\text{Ti}_3\text{C}_2\text{T}_x$ -GCE at two different electrolyte concentrations such as 0.1 M  $\text{KHCO}_3$  and 0.5 M  $\text{KHCO}_3$

**Figure S6.** The pH values of the various concentration of  $\text{KHCO}_3$  electrolytes before and after  $\text{CO}_2$  purging

**Figure S7.**  $^1\text{H}$  NMR spectra of products formed in electrolyte before and after 3 h

**Figure S8.**  $^1\text{H}$  NMR spectra of products obtained from CA analysis with different potential (vs. Ag/AgCl) for 3 h.

**Figure S9.** Linearly fitted standard calibration curves for (a) acetone, (b) methanol and (c) ethanol

**Figure S10.** Gas chromatography profiles showing the formation of (a)  $\text{CO}$ , (b)  $\text{H}_2$  and (c) overall  $\text{CO}_2$ -reduced products carried out at the constant potential of -1.1 V (vs. Ag/AgCl) for 3 h.

**Figure S11.** Electrochemical double layer plot (scan rate vs.  $\Delta J$ ) of modified  $\text{Ti}_3\text{C}_2\text{T}_x$ -GCE

**Table S1.** Electrocatalytic properties  $\text{Ti}_3\text{C}_2\text{T}_x$ -GCE with recently reported 2D materials towards  $\text{C}_1$  and  $\text{C}_{2+}$  products.

**Figure S12.** (a) FE-SEM and (b) EDX spectrum of  $\text{Ti}_3\text{C}_2\text{T}_x$ -GCE after 72 hr stability studies

**Figure S13.** Elemental mapping of  $\text{Ti}_3\text{C}_2\text{T}_x$ -GCE after 72 hr stability studies

**Figure S14.** P-XRD pattern of  $\text{Ti}_3\text{C}_2\text{T}_x$ -GCE before and after 72 hr electrolysis

**Figure S15.** Electrochemical impedance spectroscopy (EIS) of  $\text{Ti}_3\text{C}_2\text{T}_x$ -GCE before and after 72 hr electrolysis

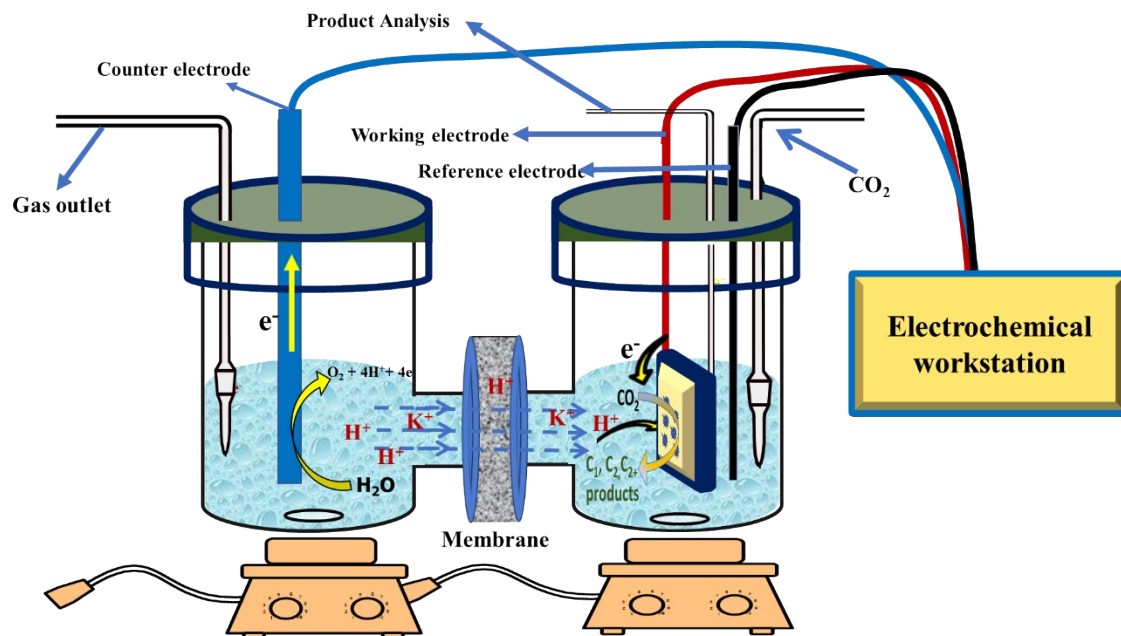

Figure S1. Schematic diagram of H-type cell

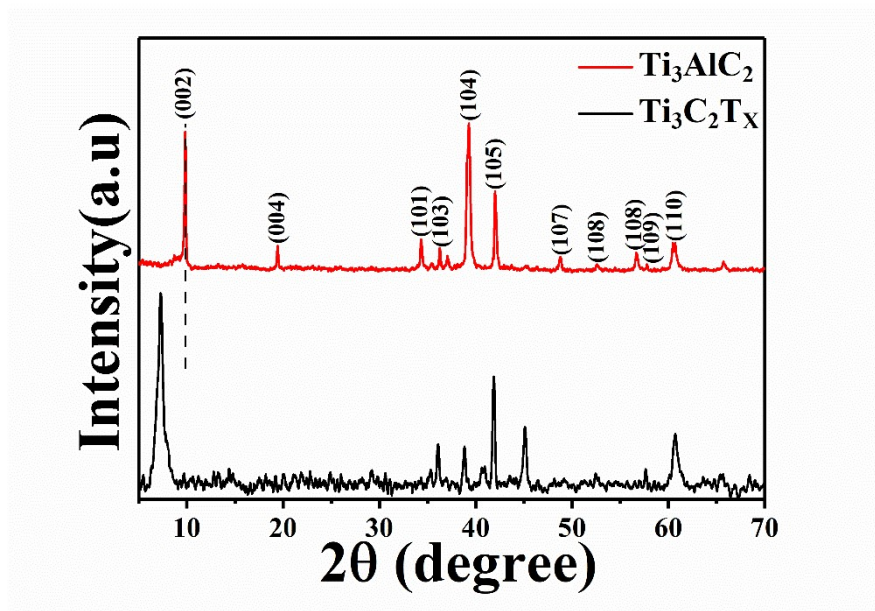

Figure S2. Powder-XRD patterns of  $\text{Ti}_3\text{AlC}_2$  MAX phase and  $\text{Ti}_3\text{C}_2\text{T}_x$

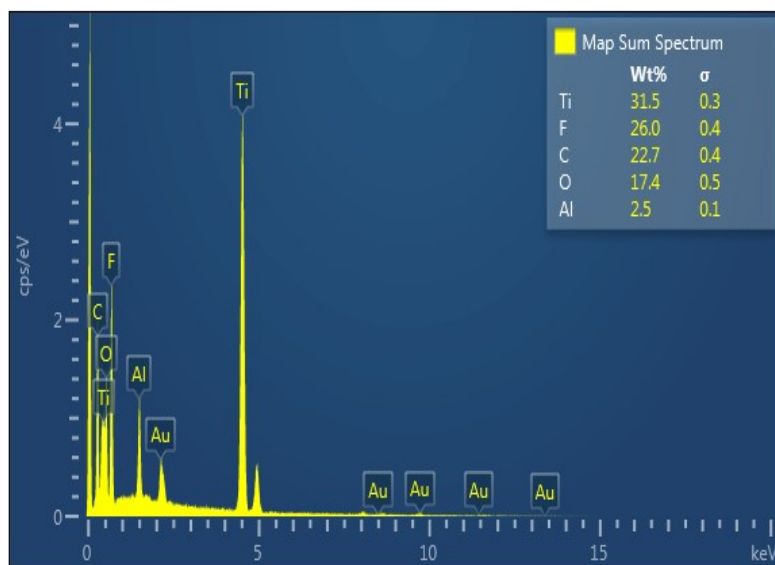

Figure S3. EDX spectra of  $\text{Ti}_3\text{C}_2\text{T}_x$

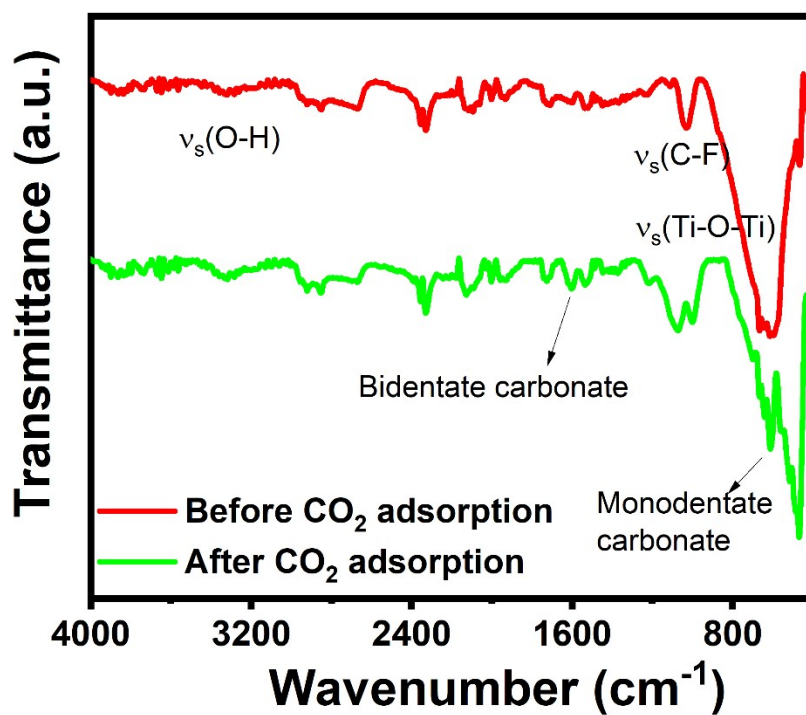

Figure S4. FT-IR spectra of  $\text{Ti}_3\text{C}_2\text{T}_x$  before and after  $\text{CO}_2$  adsorption

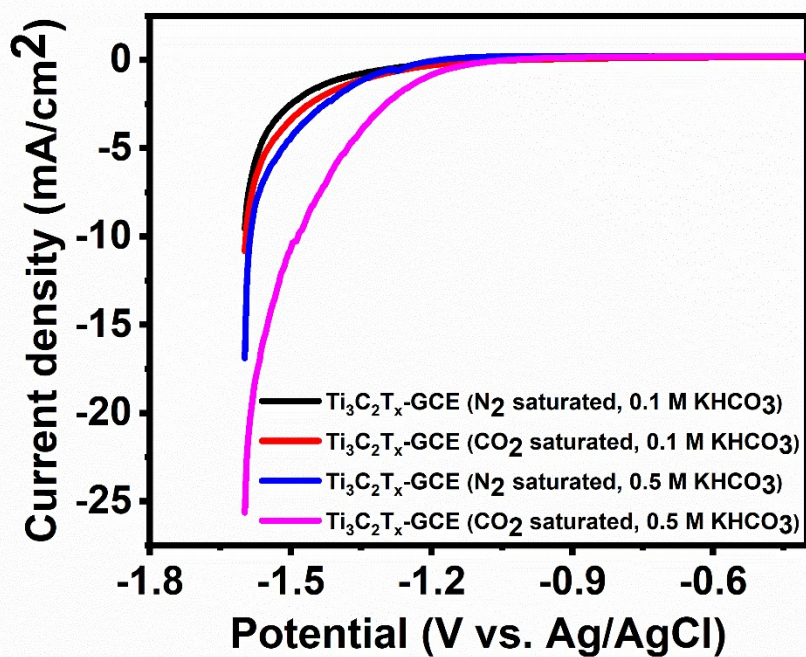

**Figure S5.** LSV curves comparison at two different electrolyte concentrations, 0.1 M  $\text{KHCO}_3$  and 0.5 M  $\text{KHCO}_3$ .

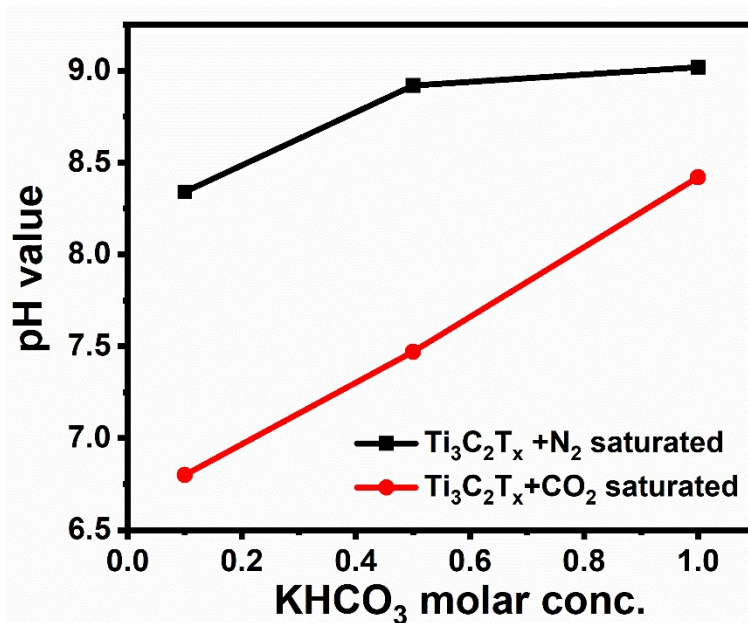

**Figure S6.** The pH values of the various concentration of  $\text{KHCO}_3$  electrolytes before and after  $\text{CO}_2$  purging

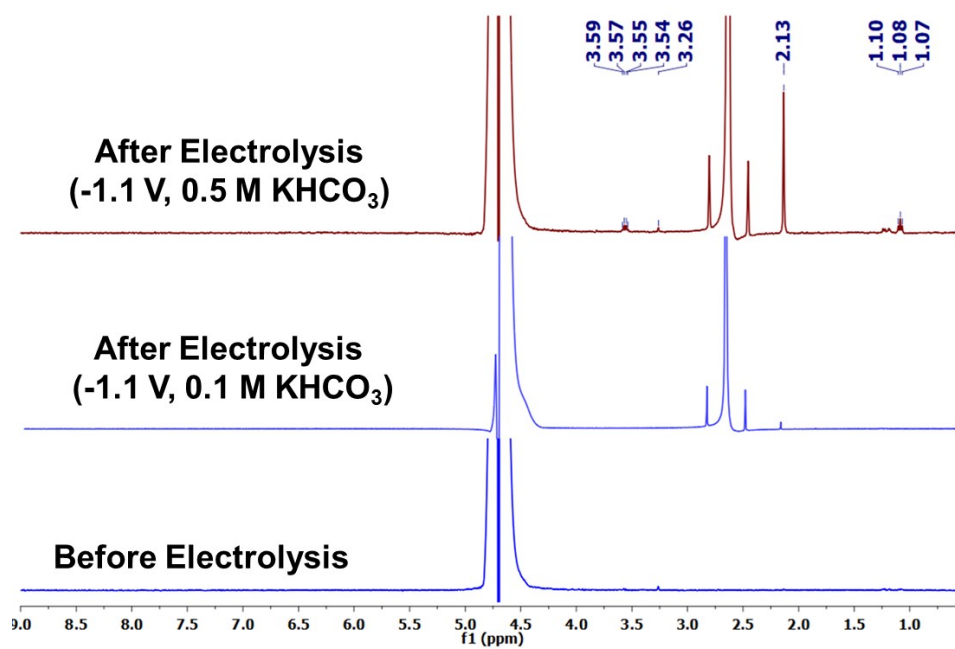

**Figure S7.**  $^1\text{H}$  NMR spectra of electrolysis products formed in two different electrolyte concentrations before and after 3 h

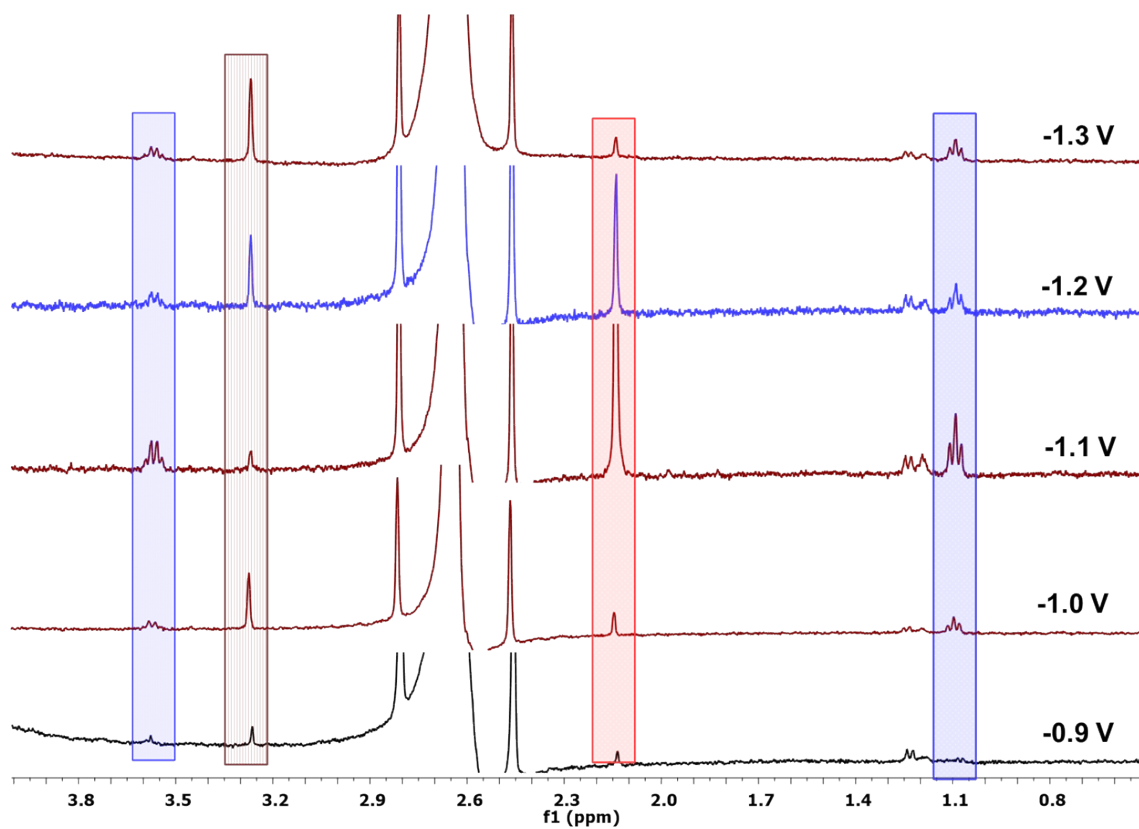

**Figure S8.**  $^1\text{H}$  NMR spectra of products obtained from CA analysis with different potential (vs. Ag/AgCl) for 3 h.

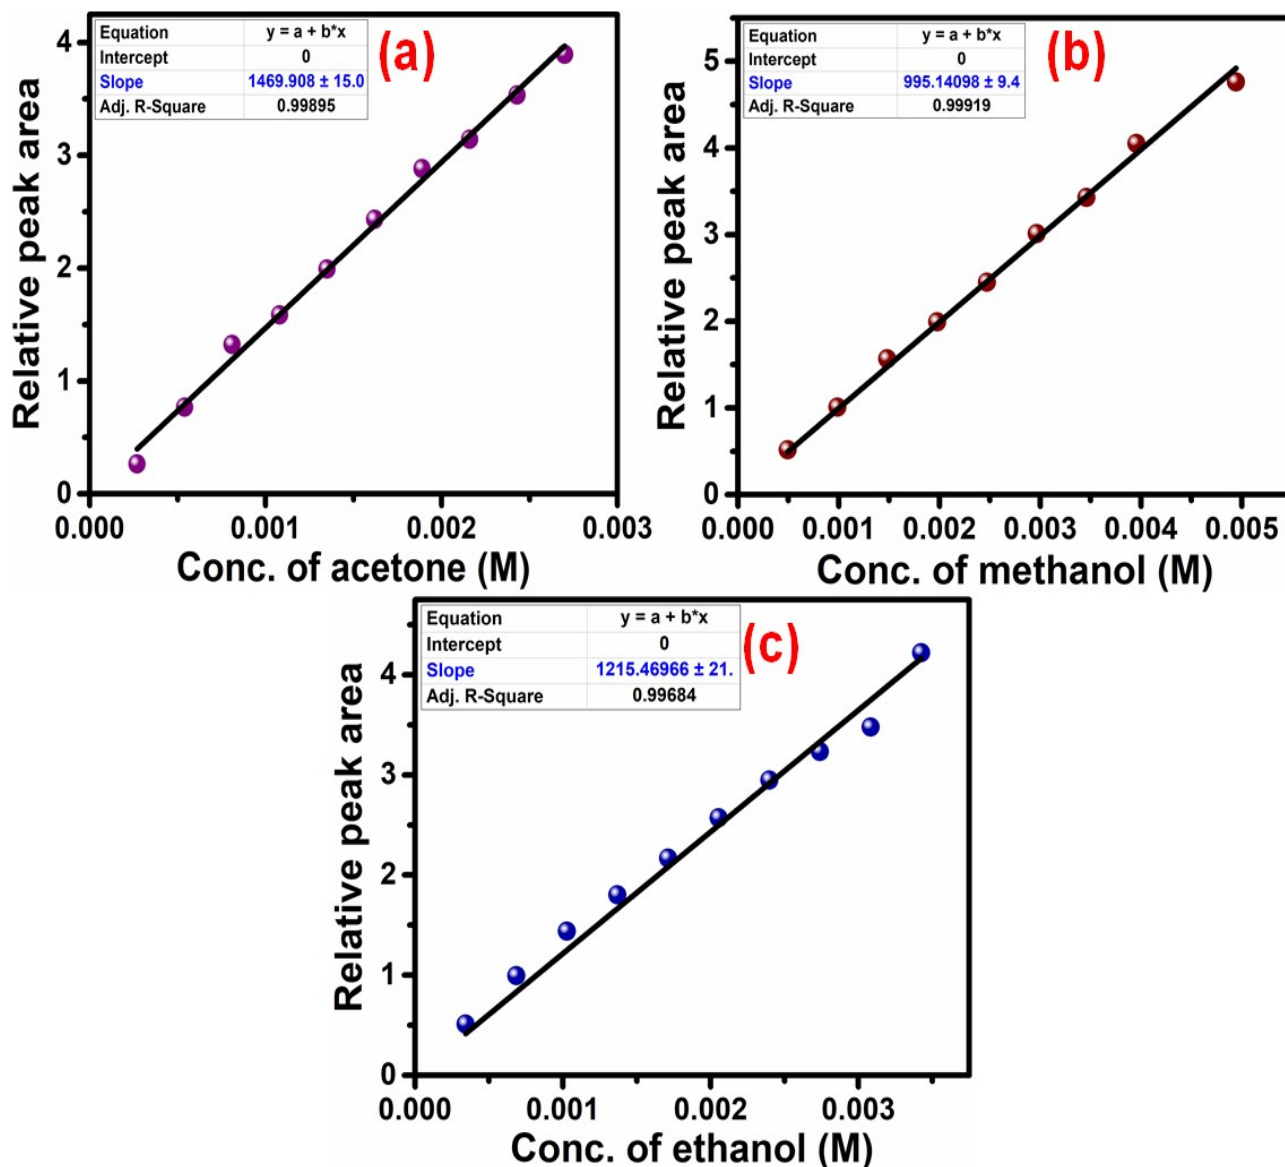

**Figure S9.** Linearly fitted standard calibration plots for (a) acetone, (b) methanol and (c) ethanol. The relative peak areas refer to ratios of  $^1\text{H-NMR}$  peak areas (for methyl ( $-\text{CH}_3$ ) protons) of the organic products (keeping a varying known concentration) with that of an internal standard DMSO (keeping a fixed known concentration) recorded in the identical solvent system as in the electrolysis.



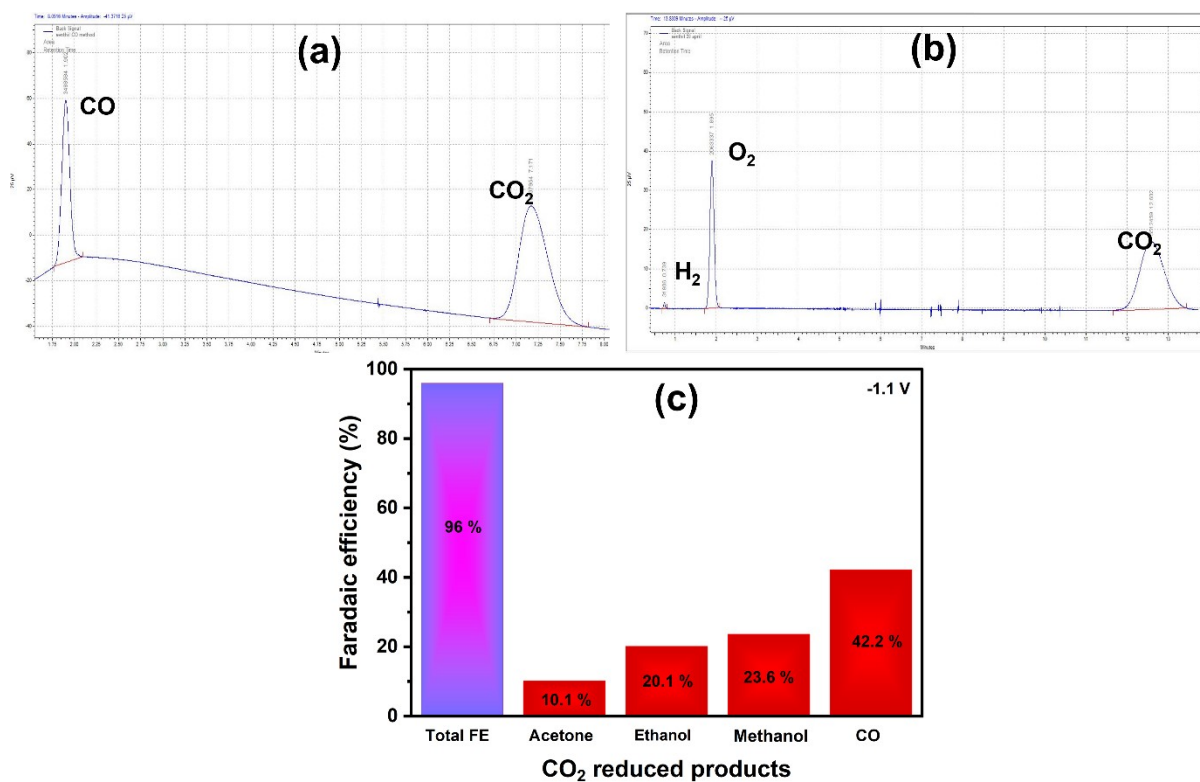

**Figure S10.** Gas chromatography profiles showing the formation of (a) CO, (b) H<sub>2</sub> and (c) overall CO<sub>2</sub>-reduced products carried out at the constant potential of -1.1 V (vs. Ag/AgCl) for 3 h.

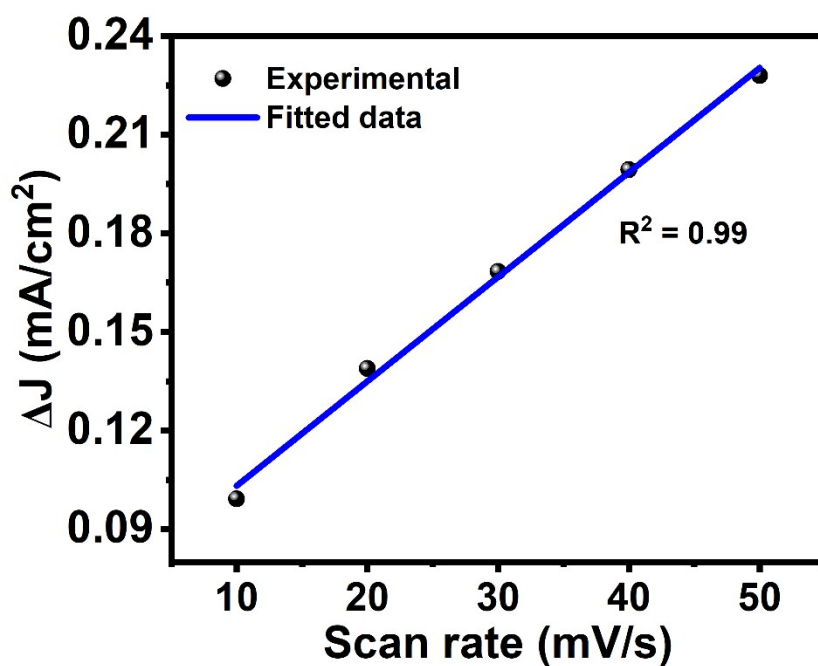

**Figure S11.** Electrochemical double layer plot (Scan rate vs.  $\Delta J$ ) of modified  $\text{Ti}_3\text{C}_2\text{T}_x$ -GCE**Table S1.** Electrocatalytic properties  $\text{Ti}_3\text{C}_2\text{T}_x$ -GCE with recently reported 2D materials towards  $\text{C}_1$  and  $\text{C}_{2+}$  products.

| Electrocatalyst                                    | Electrolyte                                     | Operating potential | Products                                | Faradaic efficiency | References       |
|----------------------------------------------------|-------------------------------------------------|---------------------|-----------------------------------------|---------------------|------------------|
| $\text{Ti}_3\text{C}_2\text{T}_x$ -GCE             | 0.5 M $\text{KHCO}_3$                           | -0.45 V (vs RHE)    | Ethanol, Methanol & Acetone             | 96 %                | <b>This work</b> |
| $\text{Ti}_2\text{CT}_x$                           | Acetonitrile+ DI water+ $\text{BMIMBF}_4$       | -1.8 V (vs SHE)     | $\text{HCOOH}$                          | 56.1 %              | <sup>1</sup>     |
| N-doped $\text{Ti}_3\text{C}_2$                    | Seawater                                        | -0.7 V (vs RHE)     | CO                                      | 92 %                | <sup>2</sup>     |
| $\text{Mo}_2\text{C}$ & $\text{Ti}_3\text{C}_2$    | (1-ethyl-2-methylimidazolium tetrafluoroborate) | -2.5 V (vs SHE)     | CO                                      | 90 % & 65 %         | <sup>3</sup>     |
| $\text{Cu}/\text{Ti}_3\text{C}_2\text{T}_x$        | 1M KOH                                          | -0.7 V (vs RHE)     | $\text{C}_2\text{H}_4$ , EtOH & acetate | 71 %, 25 % & 2.2 %  | <sup>4</sup>     |
| $\text{Ti}_3(\text{Al}_{1-x}\text{Cu}_x)\text{Cu}$ | 0.1M $\text{KHCO}_3$                            | -1.4 V (vs SHE)     | $\text{CH}_3\text{OH}$                  | 59.1 %              | <sup>5</sup>     |
| BiOBr templated catalyst                           | 0.1M $\text{KHCO}_3$                            | -1.0 V (vs RHE)     | Formate                                 | 90 %                | <sup>6</sup>     |

|                                              |                         |                     |                               |        |    |
|----------------------------------------------|-------------------------|---------------------|-------------------------------|--------|----|
| Sn sheets<br>confined<br>graphene            | 0.1M NaHCO <sub>3</sub> | -1.8 V (vs<br>SHE)  | Formate                       | 89 %   | 7  |
| 2D SnO <sub>2</sub>                          | 0.1M NaHCO <sub>3</sub> | -1.13 V<br>(vs RHE) | Formate                       | 90 %   | 8  |
| SnO <sub>2</sub> @ N-<br>doped<br>nanocarbon | 0.1M KHCO <sub>3</sub>  | -1.2 V (vs<br>RHE)  | Formate                       | 93.2 % | 9  |
| Bi <sub>2</sub> O <sub>3</sub>               | 0.5M KHCO <sub>3</sub>  | -0.9 V (vs<br>RHE)  | Formate                       | 91 %   | 10 |
| Cu nanosheets                                | 2 M KOH                 | -                   | Acetate                       | 48 %   | 11 |
| SnO <sub>2</sub> on CuO                      | 0.5M KHCO <sub>3</sub>  | -1.0 V (vs<br>RHE)  | C <sub>2</sub> H <sub>4</sub> | 22 %   | 12 |
| Cu-Cu <sub>2</sub> O                         | 0.1M KHCO <sub>3</sub>  | -1.1 V (vs<br>RHE)  | C <sub>2</sub> H <sub>4</sub> | 36 %   | 13 |
| Pd/SnO <sub>2</sub>                          | 0.1M NaHCO <sub>3</sub> | -0.26 V<br>(vs RHE) | CH <sub>3</sub> OH            | 34 %   | 14 |
| CuO/TiO <sub>2</sub>                         | 0.1M KHCO <sub>3</sub>  | -0.85 V<br>(vs RHE) | EtOH,<br>acetone<br>&acetate  | 47.4 % | 15 |

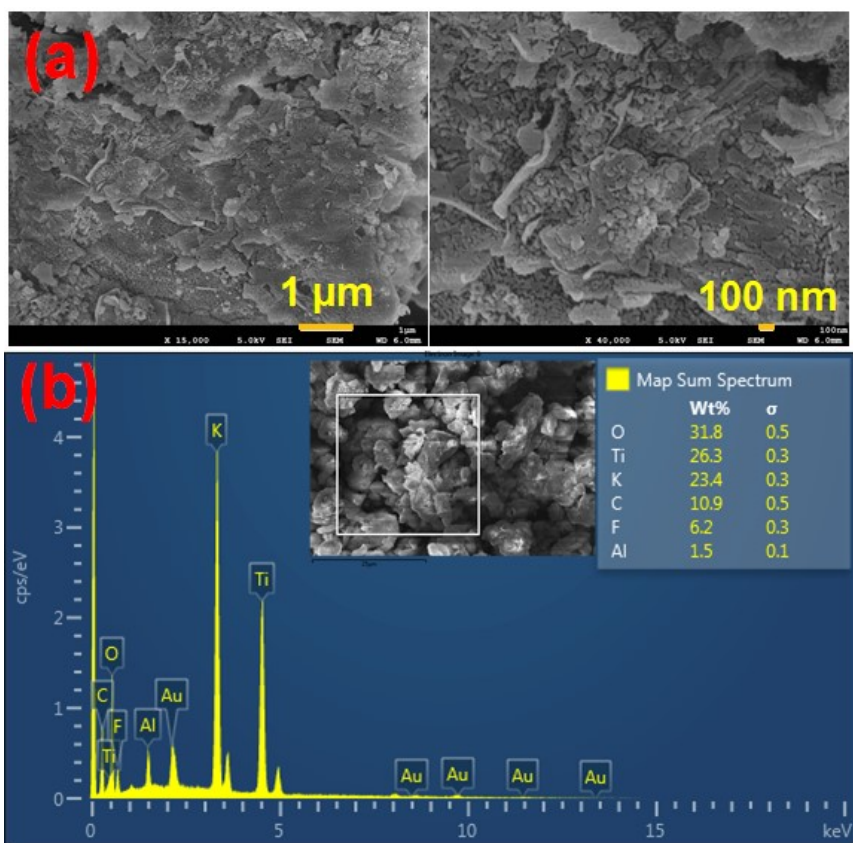

**Figure S12.** (a) FE-SEM and (b) EDX spectrum of  $\text{Ti}_3\text{C}_2\text{T}_x$ -GCE after 72 h of electrocatalysis

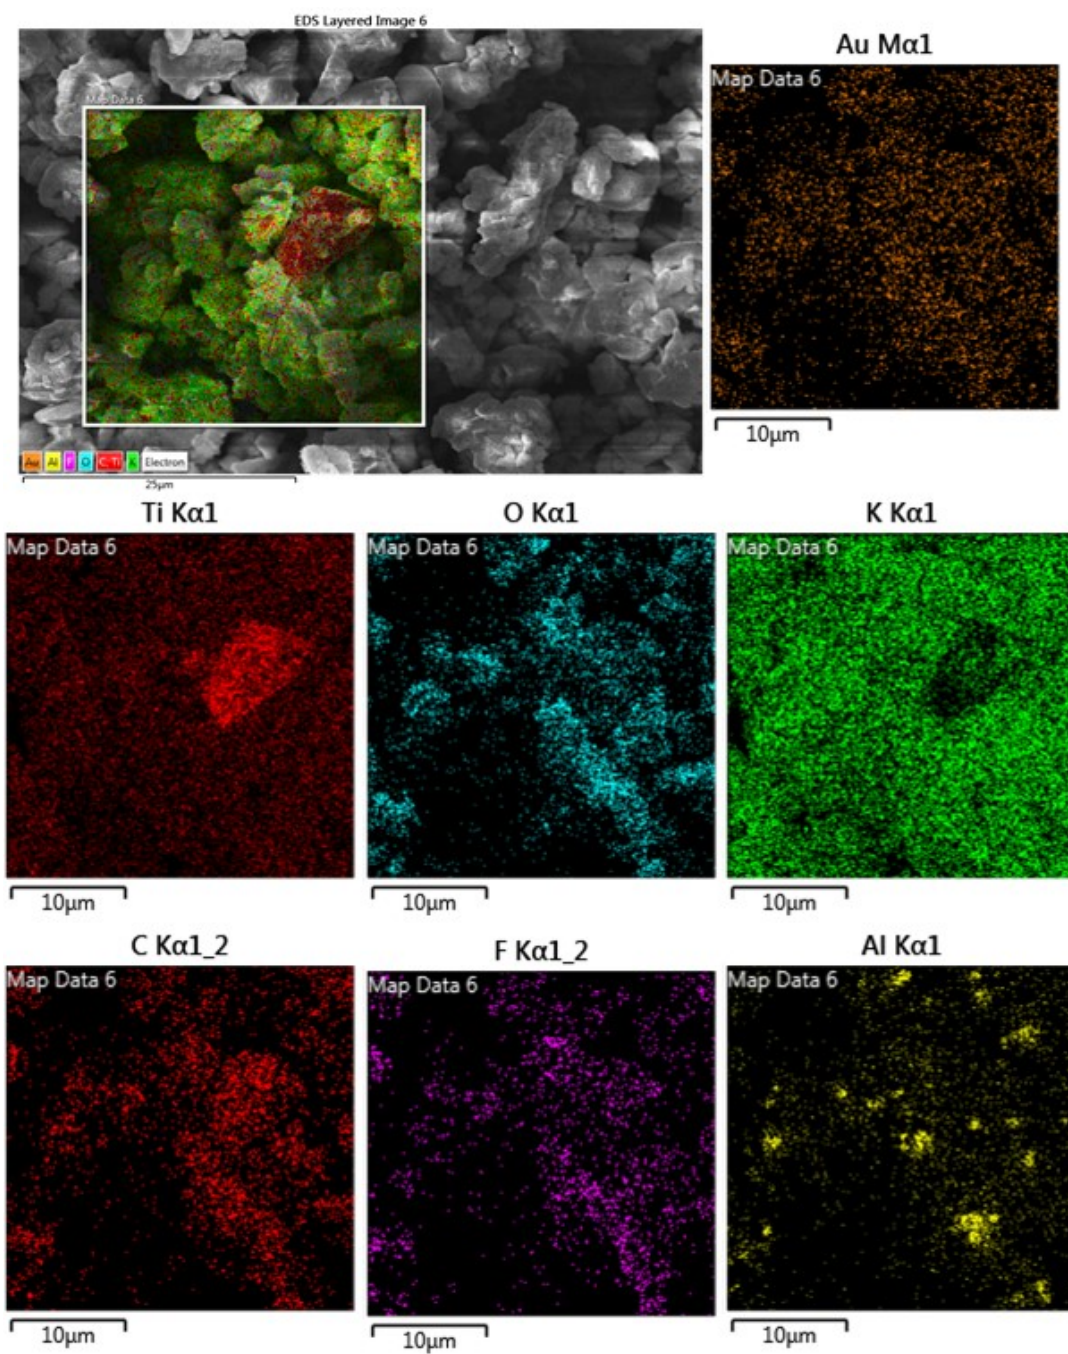

**Figure S13.** Elemental mapping of  $Ti_3C_2T_x$ -GCE after 72 hr stability studies

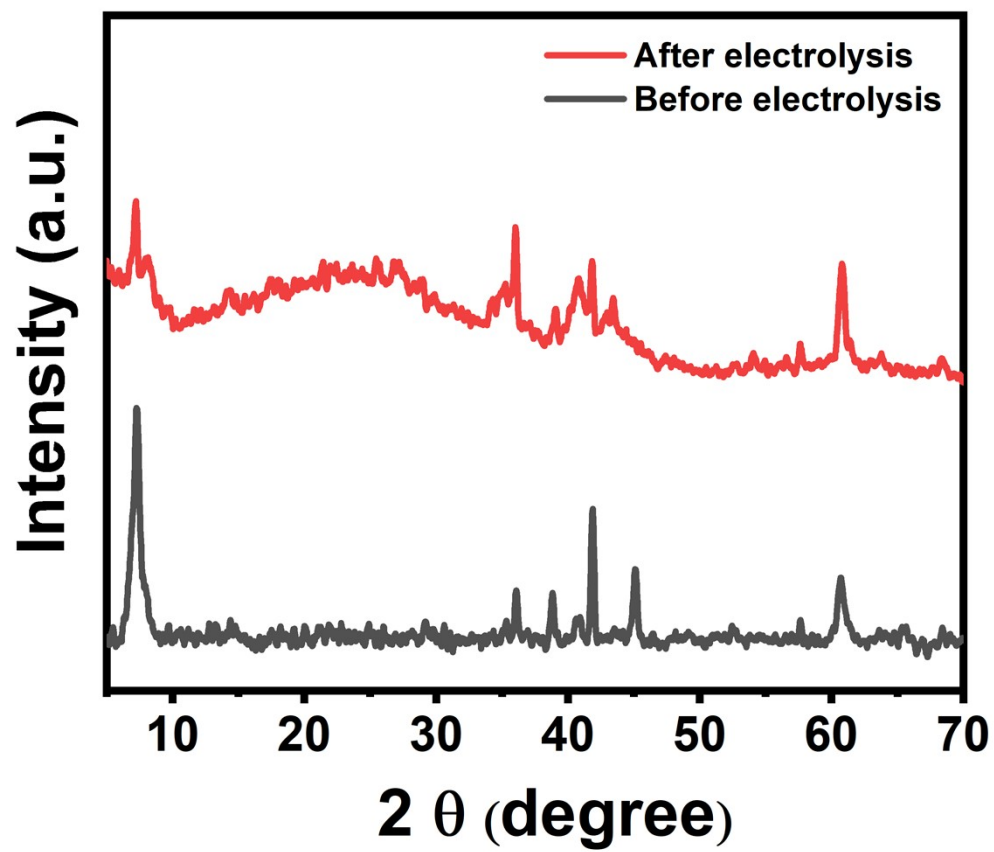

**Figure S14.** P-XRD pattern of  $\text{Ti}_3\text{C}_2\text{T}_x$  before and after 72 hr electrolysis

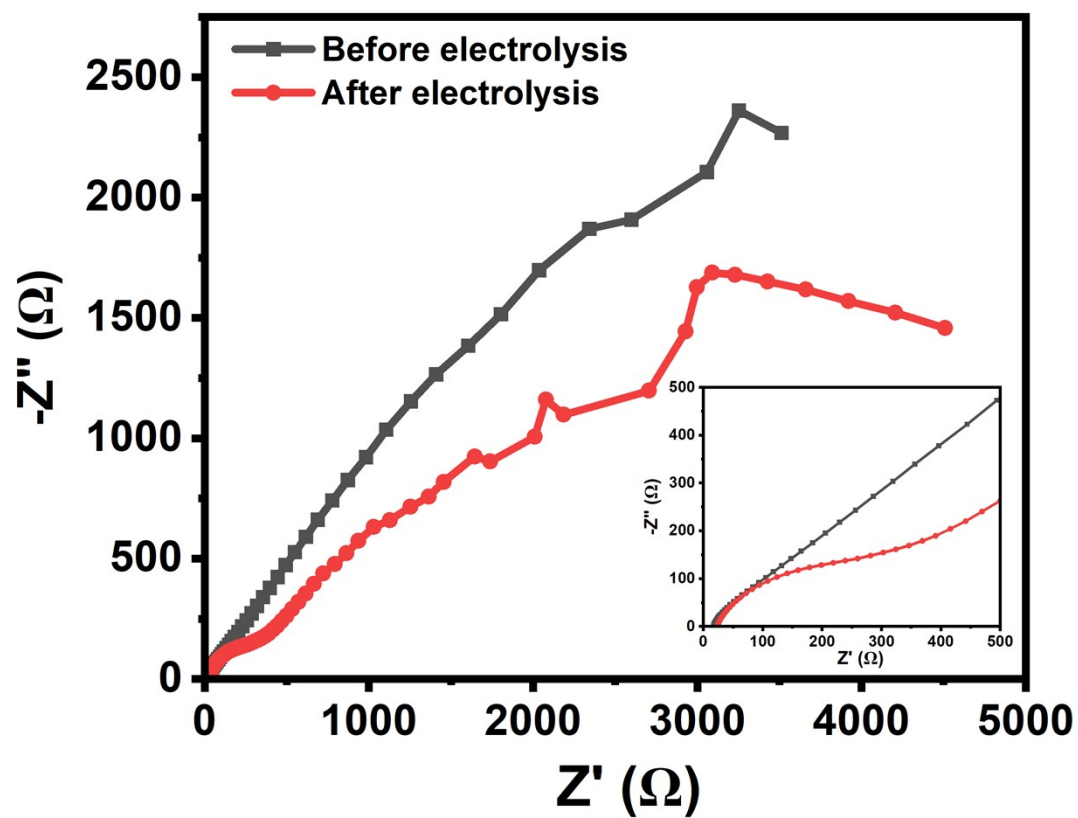

**Figure S15.** Electrochemical impedance spectroscopy (EIS) of  $\text{Ti}_3\text{C}_2\text{T}_x$ -GCE before and after 72 hr electrolysis

## References

- 1 A. D. Handoko, H. Chen, Y. Lum, Q. Zhang, B. Anasori and Z. W. Seh, *iScience*, 2020, **23**, 101181.
- 2 D. Qu, X. Peng, Y. Mi, H. Bao, S. Zhao, X. Liu and J. Luo, *Nanoscale*, 2020, **12**, 17191–17195.
- 3 N. H. Attanayake, H. R. Banjade, A. C. Thenuwara, B. Anasori, Q. Yan and D. R. Strongin, *Chemical Communications*, 2021, **57**, 1675–1678.
- 4 H. Bao, Y. Qiu, X. Peng, J. ao Wang, Y. Mi, S. Zhao, X. Liu, Y. Liu, R. Cao, L. Zhuo, J. Ren, J. Sun, J. Luo and X. Sun, *Nat Commun*, 2021, **12**, 1–9.
- 5 Q. Zhao, C. Zhang, R. Hu, Z. Du, J. Gu, Y. Cui, X. Chen, W. Xu, Z. Cheng, S. Li, B. Li, Y. Liu, W. Chen, C. Liu, J. Shang, L. Song and S. Yang, *ACS Nano*, 2021, **15**, 4927–4936.
- 6 F. P. García de Arquer, O. S. Bushuyev, P. De Luna, C. T. Dinh, A. Seifitokaldani, M. I. Saidaminov, C. S. Tan, L. N. Quan, A. Proppe, M. G. Kibria, S. O. Kelley, D. Sinton and E. H. Sargent, *Advanced Materials*, 2018, **30**, 6–11.
- 7 F. Lei, W. Liu, Y. Sun, J. Xu, K. Liu, L. Liang, T. Yao, B. Pan, S. Wei and Y. Xie, *Nat Commun*, 2016, **7**, 1–8.
- 8 J. Li, J. Jiao, H. Zhang, P. Zhu, H. Ma, C. Chen, H. Xiao and Q. Lu, *ACS Sustain Chem Eng*, 2020, **8**, 4975–4982.
- 9 Y. Fu, T. Wang, W. Zheng, C. Lei, B. Yang, J. Chen, Z. Li, L. Lei, C. Yuan and Y. Hou, *ACS Appl Mater Interfaces*, 2020, **12**, 16178–16185.
- 10 P. Deng, H. Wang, R. Qi, J. Zhu, S. Chen, F. Yang, L. Zhou, K. Qi, H. Liu and B. Y. Xia, *ACS Catal*, 2020, **10**, 743–750.
- 11 W. Luc, X. Fu, J. Shi, J. J. Lv, M. Jouny, B. H. Ko, Y. Xu, Q. Tu, X. Hu, J. Wu, Q. Yue, Y. Liu, F. Jiao and Y. Kang, *Nat Catal*, 2019, **2**, 423–430.
- 12 Y. Lan, G. Niu, F. Wang, D. Cui and Z. Hu, *ACS Appl Mater Interfaces*, 2020, **12**, 36128–36136.
- 13 N. Altaf, S. Liang, L. Huang and Q. Wang, *Journal of Energy Chemistry*, 2020, **48**, 169–180.
- 14 W. Zhang, Q. Qin, L. Dai, R. Qin, X. Zhao, X. Chen, D. Ou, J. Chen, T. T. Chuong, B. Wu and N. Zheng, *Angewandte Chemie - International Edition*, 2018, **57**, 9475–9479.
- 15 J. Yuan, J. J. Zhang, M. P. Yang, W. J. Meng, H. Wang and J. X. Lu, *Catalysts*, , DOI:10.3390/catal8040171.
